# Supplementary material
Source: PubMed Central journal article supplement (PMC8268117)
Supplement: NIHMS1585901-supplement-1.pdf [file NIHMS1585901-supplement-1.pdf]

**Appendix 1. Sensitivity analyses predicting loss to follow-up (LTFU) by pre-disaster psychiatric disorder: The PREDICT study (2003-2011).**

| <i>Pre-disaster Disorder</i> | <i>n among those<br/>LTFU (n=941)*</i> | <i>n among those not<br/>LTFU (n=1,708)**</i> | $\chi^2$ | <i>p</i> |
|------------------------------|----------------------------------------|-----------------------------------------------|----------|----------|
| <b>Eating Disorders</b>      |                                        |                                               |          |          |
| Yes                          | 8                                      | 17                                            | 0.137    | 0.712    |
| No                           | 933                                    | 1,691                                         |          |          |
| <b>Anorexia</b>              |                                        |                                               |          |          |
| Yes                          | 1                                      | 0                                             | 1.817    | 0.178    |
| No                           | 939                                    | 1,707                                         |          |          |
| <b>Bulimia</b>               |                                        |                                               |          |          |
| Yes                          | 7                                      | 17                                            | 0.427    | 0.513    |
| No                           | 934                                    | 1,691                                         |          |          |
| <b>Mood Disorders</b>        |                                        |                                               |          |          |
| Yes                          | 260                                    | 520                                           | 2.314    | 0.128    |
| No                           | 681                                    | 1,188                                         |          |          |
| <b>Major Depressive</b>      |                                        |                                               |          |          |
| Yes                          | 219                                    | 417                                           | 0.323    | 0.570    |
| No                           | 712                                    | 1,284                                         |          |          |
| <b>Bipolar I</b>             |                                        |                                               |          |          |
| Yes                          | 16                                     | 36                                            | 0.523    | 0.469    |
| No                           | 925                                    | 1,672                                         |          |          |
| <b>Dysthymia</b>             |                                        |                                               |          |          |

|                                           |     |       |       |       |
|-------------------------------------------|-----|-------|-------|-------|
| Yes                                       | 59  | 133   | 2.098 | 0.148 |
| No                                        | 873 | 1,557 |       |       |
| <hr/>                                     |     |       |       |       |
| Psychotic Disorders                       |     |       |       |       |
| Yes                                       | 27  | 45    | 0.130 | 0.718 |
| No                                        | 910 | 1,658 |       |       |
| <hr/>                                     |     |       |       |       |
| Schizophrenia                             |     |       |       |       |
| Yes                                       | 4   | 6     | 0.076 | 0.783 |
| No                                        | 911 | 1,632 |       |       |
| <hr/>                                     |     |       |       |       |
| Schizophreniform                          |     |       |       |       |
| Yes                                       | 1   | 1     | 0.184 | 0.668 |
| No                                        | 931 | 1,692 |       |       |
| <hr/>                                     |     |       |       |       |
| Schizoaffective                           |     |       |       |       |
| Yes                                       | 1   | 2     | 0.007 | 0.935 |
| No                                        | 931 | 1,686 |       |       |
| <hr/>                                     |     |       |       |       |
| Delusional                                |     |       |       |       |
| Yes                                       | 1   | 0     | 1.798 | 0.180 |
| No                                        | 921 | 1,657 |       |       |
| <hr/>                                     |     |       |       |       |
| Brief Psychotic                           |     |       |       |       |
| Yes                                       | 21  | 37    | 0.014 | 0.904 |
| No                                        | 868 | 1,581 |       |       |
| <hr/>                                     |     |       |       |       |
| Anxiety Disorders (not<br>including PTSD) |     |       |       |       |
| Yes                                       | 332 | 707   | 9.507 | 0.002 |

|                      |     |       |        |       |
|----------------------|-----|-------|--------|-------|
| No                   | 609 | 1,001 |        |       |
| <hr/>                |     |       |        |       |
| Obsessive Compulsive |     |       |        |       |
| Yes                  | 19  | 24    | 1.367  | 0.242 |
| No                   | 885 | 1,603 |        |       |
| <hr/>                |     |       |        |       |
| Panic                |     |       |        |       |
| Yes                  | 53  | 75    | 2.015  | 0.156 |
| No                   | 883 | 1,622 |        |       |
| <hr/>                |     |       |        |       |
| Agoraphobia          |     |       |        |       |
| Yes                  | 47  | 70    | 1.096  | 0.295 |
| No                   | 885 | 1,613 |        |       |
| <hr/>                |     |       |        |       |
| Social Phobia        |     |       |        |       |
| Yes                  | 47  | 90    | 0.092  | 0.761 |
| No                   | 881 | 1,595 |        |       |
| <hr/>                |     |       |        |       |
| Generalized Anxiety  |     |       |        |       |
| Yes                  | 9   | 20    | 0.253  | 0.615 |
| No                   | 928 | 1,684 |        |       |
| <hr/>                |     |       |        |       |
| Specific Phobia      |     |       |        |       |
| Yes                  | 300 | 659   | 11.658 | 0.001 |
| No                   | 637 | 1,044 |        |       |
| <hr/>                |     |       |        |       |
| Somatoform Disorders |     |       |        |       |
| Yes                  | 107 | 177   | 0.644  | 0.422 |
| No                   | 834 | 1,531 |        |       |
| <hr/>                |     |       |        |       |
| Somatization         |     |       |        |       |

|                  |     |       |       |       |
|------------------|-----|-------|-------|-------|
| Yes              | 2   | 1     | 1.269 | 0.260 |
| No               | 939 | 1,705 |       |       |
| <hr/>            |     |       |       |       |
| Conversion       |     |       |       |       |
| Yes              | 55  | 89    | 0.357 | 0.550 |
| No               | 829 | 1,491 |       |       |
| <hr/>            |     |       |       |       |
| Pain             |     |       |       |       |
| Yes              | 64  | 104   | 0.505 | 0.477 |
| No               | 803 | 1,467 |       |       |
| <hr/>            |     |       |       |       |
| Hypochondriasis  |     |       |       |       |
| Yes              | 37  | 57    | 0.633 | 0.426 |
| No               | 900 | 1,645 |       |       |
| <hr/>            |     |       |       |       |
| Substance Misuse |     |       |       |       |
| Yes              | 165 | 231   | 7.673 | 0.006 |
| No               | 776 | 1,477 |       |       |

\*n's may not add up to 941 because of missing observations (<1%)

\*\*n's may not add up to 1708 because of missing observations (<1%)

## **Appendix 2. Description of the Depressive Disorders Module in the Composite International Diagnostic Interview (CIDI), Spanish version 2.1**

This module begins with two screening questions concerning lifetime depression episodes. The first question asks whether the participant has ever felt sad, empty, or depressed for two weeks or longer. The second question asks whether the participant has ever lost interest in things he/she used to enjoy for a period of two weeks or longer. Participants who endorsed either question were given the full depression module. Following DSM-IV-TR diagnostic criteria, the full module asks questions whether the participant had ever felt the following symptoms for a period of two or more weeks: lack of energy, change in appetite, sleep problems, slowness/restlessness, feelings of worthlessness or guilt, lack of confidence, difficulty concentrating, and thoughts of death. To meet diagnostic criteria for MDD, five (or more) of the symptoms have been present during the same two-week period and represent a change from previous functioning; at least one of the symptoms is either: 1) depressed mood; or 2) loss of interest or pleasure (i.e., the screening questions). Symptoms are assessed for lifetime episodes, past year episodes, and during the most symptomatic episode (if applicable). The module also assesses about how many depressive episodes the individual has ever had, the age of onset and offset of symptoms, the severity of depressive symptoms, and whether they had sought help from a doctor during their depressive episodes (1).

- 1) World Health Organization. (1997) Composite International Diagnostic Interview (CIDI, Spanish Version 2.1). Geneva, Switzerland.
